# Supplementary material for: Diversity and toxigenicity of fungi and description of Fusarium madaense sp. nov. from cereals, legumes and soils in north-central Nigeria
Source: MycoKeys. 2020 Jun 8;67:95–124. doi: 10.3897/mycokeys.67.52716 (PMC7295817; doi:10.3897/mycokeys.67.52716)
Supplement: Supplementary material 1 — Tables S1, S2 [file mycokeys-67-095-s001.xlsx]

## Sheet: Supplementary Table 1
Strain details and GenBank accession numbers of molecularly identified isolates included in this study
Species name	DTO number	CBS number	Location	State	Substrate	GenBank/ENA accession number							Extrolite analysis
						BenA	CaM	RPB1	RPB2	TEF-1a	ITS	LSU
Aspergillus aflatoxiformans	DTO 421-G3		Diko	Niger	Soil from maize and sorghum farm	-	MT261254	-	-	-	-	-
Aspergillus aflatoxiformans	DTO 421-G4		Diko	Niger	Soil from maize and sorghum farm	-	MT261255	-	-	-	-	-
Aspergillus aflatoxiformans	DTO 421-G5		Nubwa Koro	Niger	Soil from yam farm	-	MT261256	-	-	-	-	-
Aspergillus aflatoxiformans	DTO 422-A2		Mada station	Nasarawa	Cowpea	MT261351	MT261280	-	-	-	-	-	x
Aspergillus aflatoxiformans	DTO 422-E5		Tundun Adabu	Nasarawa	Sorghum	MT261353	MT261282	-	-	-	-	-
Aspergillus aflatoxiformans	DTO 422-E6		Mada station	Nasarawa	Maize	MT261354	MT261283	-	-	-	-	-
Aspergillus aflatoxiformans	DTO 422-E7		Mada station	Nasarawa	Soil from maize farm	MT261355	MT261284	-	-	-	-	-
Aspergillus aflatoxiformans	DTO 422-E8		Diko	Niger	Soil from maize and sorghum farm	MT261356	MT261285	-	-	-	-	-
Aspergillus aflatoxiformans	DTO 422-E9		Nubwa Koro	Niger	Soil from yam farm	-	MT261286	-	-	-	-	-
Aspergillus aflatoxiformans	DTO 422-F1		Yelwa Doma	Nasarawa	Maize	-	MT261287	-	-	-	-	-
Aspergillus aflatoxiformans	DTO 422-F2		Sabon Wuse	Niger	Maize	-	MT261288	-	-	-	-	-
Aspergillus aflatoxiformans	DTO 422-F3		Diko	Niger	Soil from maize and sorghum farm	-	MT261289	-	-	-	-	-
Aspergillus aflatoxiformans	DTO 422-F4		Diko	Niger	Soil from maize and sorghum farm	-	MT261290	-	-	-	-	-
Aspergillus aflatoxiformans	DTO 422-F6		Diko	Niger	Soil from maize and sorghum farm	-	MT261292	-	-	-	-	-
Aspergillus aflatoxiformans	DTO 422-F7		Nubwa Koro	Niger	Soil from yam farm	-	MT261293	-	-	-	-	-
Aspergillus aflatoxiformans	DTO 422-F8		Mada station	Nasarawa	Soil from yam farm	-	MT261294	-	-	-	-	-
Aspergillus aflatoxiformans	DTO 422-F9		Tundun Adabu	Nasarawa	Maize	-	MT261295	-	-	-	-	-
Aspergillus aflatoxiformans	DTO 422-G1		Diko	Niger	Soil from maize and sorghum farm	-	MT261296	-	-	-	-	-
Aspergillus aflatoxiformans	DTO 422-G2		Diko	Niger	Cowpea	-	MT261297	-	-	-	-	-	x
Aspergillus aflatoxiformans	DTO 422-G3		Diko	Niger	Soil from maize and sorghum farm	-	MT261298	-	-	-	-	-
Aspergillus aflatoxiformans	DTO 422-G4		Diko	Niger	Soil from maize and sorghum farm	-	MT261299	-	-	-	-	-
Aspergillus aflatoxiformans	DTO 422-G5		Sabon Wuse	Niger	Maize	-	MT261300	-	-	-	-	-
Aspergillus aflatoxiformans	DTO 422-G6		Yelwa Doma	Nasarawa	Maize	-	MT261301	-	-	-	-	-
Aspergillus aflatoxiformans	DTO 422-G7		Sabon Wuse	Niger	Maize	-	MT261302	-	-	-	-	-
Aspergillus aflatoxiformans	DTO 422-G8		Tundun Adabu	Nasarawa	Maize	-	MT261303	-	-	-	-	-
Aspergillus aflatoxiformans	DTO 422-G9		Diko	Niger	Soil from maize and sorghum farm	-	MT261304	-	-	-	-	-
Aspergillus aflatoxiformans	DTO 422-H2		Tundun Adabu	Nasarawa	Soil from yam farm	-	MT261306	-	-	-	-	-
Aspergillus aflatoxiformans	DTO 422-H7		Diko	Niger	Soil from maize and sorghum farm	-	MT261311	-	-	-	-	-
Aspergillus aflatoxiformans	DTO 422-H9		Tundun Adabu	Nasarawa	Maize	-	MT261312	-	-	-	-	-
Aspergillus aflatoxiformans	DTO 422-I2		Tundun Adabu	Nasarawa	Sorghum	-	MT261314	-	-	-	-	-
Aspergillus aflatoxiformans	DTO 422-I3		Tundun Adabu	Nasarawa	Sorghum	-	MT261315	-	-	-	-	-
Aspergillus aflatoxiformans	DTO 422-I4		Diko	Niger	Soil from maize and sorghum farm	-	MT261316	-	-	-	-	-
Aspergillus aflatoxiformans	DTO 422-I5		Diko	Niger	Soil from maize and sorghum farm	-	MT261317	-	-	-	-	-
Aspergillus austwickii	DTO 422-H1		Nubwa Koro	Niger	Soil from yam farm	-	MT261305	-	-	-	-	-	x
Aspergillus brunneoviolaceus	DTO 422-H4		Yelwa Doma	Nasarawa	Soil from groundnut and maize farm	-	MT261308	-	-	-	-	-	x
Aspergillus brunneoviolaceus	DTO 422-I6		Mada station	Nasarawa	Soil from rice farm	-	MT261318	-	-	-	-	-	x
Aspergillus brunneoviolaceus	DTO 422-I7		Mada station	Nasarawa	Soil from rice farm	-	MT261319	-	-	-	-	-
Aspergillus cerealis	DTO 422-F5		Diko	Niger	Soil from maize and sorghum farm	-	MT261291	-	-	-	-	-	x
Aspergillus flavus	DTO 421-F4		Sabon Wuse	Niger	Maize	-	MT261249	-	-	-	-	-
Aspergillus flavus	DTO 421-F7		Mada station	Nasarawa	Sorghum	-	MT261250	-	-	-	-	-
Aspergillus flavus	DTO 421-F8		Tundun Adabu	Nasarawa	Sorghum	-	MT261251	-	-	-	-	-
Aspergillus flavus	DTO 421-F9		Mada station	Nasarawa	Maize	-	MT261252	-	-	-	-	-
Aspergillus flavus	DTO 421-G1		Sabon Wuse	Niger	Groundnut	-	MT261253	-	-	-	-	-
Aspergillus flavus	DTO 421-G6		Sabon Wuse	Niger	Sorghum	-	MT261257	-	-	-	-	-	x
Aspergillus flavus	DTO 421-G7		Sabon Wuse	Niger	Sorghum	-	MT261258	-	-	-	-	-
Aspergillus flavus	DTO 421-G8		Mada station	Nasarawa	Maize	-	MT261259	-	-	-	-	-
Aspergillus flavus	DTO 421-G9		Sabon Wuse	Niger	Cowpea	-	MT261260	-	-	-	-	-
Aspergillus flavus	DTO 421-H1		Mada station	Nasarawa	Groundnut	-	MT261261	-	-	-	-	-	x
Aspergillus flavus	DTO 421-H6		Sabon Wuse	Niger	Maize	-	MT261266	-	-	-	-	-	x
Aspergillus flavus	DTO 422-I1		Tundun Adabu	Nasarawa	Maize	-	MT261313	-	-	-	-	-	x
Aspergillus niger	DTO 421-I3		Mada station	Nasarawa	Maize	MT261343	MT261272	-	-	-	-	-	x
Aspergillus niger	DTO 421-I4		Mada station	Nasarawa	Maize	MT261344	MT261273	-	-	-	-	-
Aspergillus niger	DTO 421-I5		Mada station	Nasarawa	Groundnut	MT261345	MT261274	-	-	-	-	-	x
Aspergillus niger	DTO 421-I6		Mada station	Nasarawa	Maize	MT261346	MT261275	-	-	-	-	-
Aspergillus niger	DTO 421-I7		Mada station	Nasarawa	Groundnut	MT261347	MT261276	-	-	-	-	-	x
Aspergillus niger	DTO 421-I8		Mada station	Nasarawa	Cowpea	MT261348	MT261277	-	-	-	-	-
Aspergillus niger	DTO 421-I9		Mada station	Nasarawa	Groundnut	MT261349	MT261278	-	-	-	-	-	x
Aspergillus niger	DTO 422-A1		Mada station	Nasarawa	Groundnut	MT261350	MT261279	-	-	-	-	-	x
Aspergillus niger	DTO 422-A3		Mada station	Nasarawa	Groundnut	MT261352	MT261281	-	-	-	-	-	x
Aspergillus niger	DTO 422-H5		Yelwa Doma	Nasarawa	Groundnut	MT261358	MT261309	-	-	-	-	-	x
Aspergillus niger	DTO 422-H6		Mada station	Nasarawa	Rice	MT261359	MT261310	-	-	-	-	-	x
Aspergillus piperis	DTO 422-I8		Tundun Adabu	Nasarawa	Soil from yam farm	-	MT261320	-	-	-	-	-	x
Aspergillus piperis	DTO 422-I9		Tundun Adabu	Nasarawa	Soil from yam farm	-	MT261321	-	-	-	-	-	x
Aspergillus tamarii	DTO 421-H2		Sabon Wuse	Niger	Maize	-	MT261262	-	-	-	-	-
Aspergillus tamarii	DTO 421-H3		Sabon Wuse	Niger	Maize	-	MT261263	-	-	-	-	-
Aspergillus tamarii	DTO 421-H4		Tundun Adabu	Nasarawa	Maize	-	MT261264	-	-	-	-	-
Aspergillus tamarii	DTO 421-H5		Yelwa Doma	Nasarawa	Maize	-	MT261265	-	-	-	-	-
Aspergillus tamarii	DTO 421-H7		Sabon Wuse	Niger	Groundnut	-	MT261267	-	-	-	-	-
Aspergillus tamarii	DTO 421-H8		Sabon Wuse	Niger	Maize	-	MT261268	-	-	-	-	-
Aspergillus tamarii	DTO 421-H9		Tundun Adabu	Nasarawa	Maize	-	MT261269	-	-	-	-	-
Aspergillus tamarii	DTO 421-I1		Tundun Adabu	Nasarawa	Maize and cassava	-	MT261270	-	-	-	-	-
Aspergillus vadensis	DTO 421-I2		Nubwa Koro	Niger	Maize	MT261342	MT261271	-	-	-	-	-	x
Aspergillus vadensis	DTO 422-H3		Tundun Adabu	Nasarawa	Maize	MT261357	MT261307	-	-	-	-	-	x
Fusarium andiyazi	DTO 424-H8	CBS 146647	Sabon Wuse	Niger	Sorghum	LR792538	LR792530	LR792570	LR792584	LR792620	-	-	x
Fusarium andiyazi	DTO 424-I6	CBS 146657	Sabon Wuse	Niger	Sorghum	LR792539	LR792531	LR792571	LR792585	LR792621	-	-	x
Fusarium madaense	DTO 424-H4	CBS 146648	Mada Station	Nasarawa	Groundnut	LR792540	LR792532	LR792572	LR792586	LR792622	-	-	x
Fusarium madaense	DTO 424-I1	CBS 146651	Mada Station	Nasarawa	Sorghum	LR792541	LR792533	LR792573	LR792587	LR792623	-	-	x
Fusarium madaense	DTO 424-I7	CBS 146656	Mada Station	Nasarawa	Groundnut	LR792542	LR792534	LR792574	LR792588	LR792624	-	-	x
Fusarium madaense		CBS 146669	Mada Station	Nasarawa	Groundnut	LR792543	LR792535	LR792575	LR792589	LR792625	-	-
Fusarium thapsinum	DTO 424-H9	CBS 146649	Mada Station	Nasarawa	Sorghum	-	-	-	LR792590	-	-	-	x
Fusarium thapsinum	DTO 424-I3	CBS 146650	Mada Station	Nasarawa	Sorghum	-	-	-	LR792591	-	-	-	x
Fusarium thapsinum		CBS 146658	Mada Station	Nasarawa	Sorghum	-	-	-	LR792592	-	-	-
Fusarium verticillioides	DTO 423-B7	CBS 146671	Mada station	Nasarawa	Sorghum	-	-	-	LR792593	-	-	MT251157	x
Fusarium verticillioides	DTO 424-H5	CBS 146654	Nubwa Koro	Niger	Maize	-	-	-	LR792594	-	-	-	x
Fusarium verticillioides	DTO 424-H6	CBS 146645	Tundun Adabu	Nasarawa	Rice	-	-	-	LR792595	-	-	-	x
Fusarium verticillioides	DTO 424-I4	CBS 146661	Diko	Niger	Maize	-	-	-	LR792596	-	-	-	x
Fusarium verticillioides	DTO 424-I5	CBS 146660	Mada Station	Nasarawa	Maize	-	-	-	LR792597	-	-	-	x
Fusarium verticillioides		CBS 146666	Nubwa Koro	Niger	Soil from maize and yam farm	-	-	-	LR792598	-	-	-
Fusarium verticillioides		CBS 146655	Sabon Wuse	Niger	Maize	-	-	-	LR792599	-	-	-
Fusarium verticillioides		CBS 146644	Tundun Adabu	Nasarawa	Maize	-	-	-	LR792600	-	-	-
Fusarium verticillioides		CBS 146659	Tundun Adabu	Nasarawa	Maize	-	-	-	LR792601	-	-	-
Fusarium verticillioides		CBS 146662	Tundun Adabu	Nasarawa	Sorghum	-	-	-	LR792602	-	-	-
Fusarium verticillioides		CBS 146665	Yelwa Doma	Nasarawa	Maize	-	-	-	LR792603	-	-	-
Macrophomina phaseolina	DTO 423-B6		Mada station	Nasarawa	Cowpea	-	-	-	-	-	-	MT251156
Meyerozyma caribbica	DTO 423-B5		Diko	Niger	Cowpea	-	-	-	-	-	-	MT251155	x
Neocosmospora falciformis	DTO 421-G2		Mada station	Nasarawa	Sorghum	-	-	-	-	-	MT251174	MT251153	x
Neocosmospora falciformis	DTO 422-H8	CBS 146670	Diko	Niger	Soil from maize and sorghum farm	-	-	-	LR792604	-	MT251175	MT251154	x
Neocosmospora falciformis	DTO 424-I2	CBS 146653	Diko	Niger	Maize	-	-	-	LR792605	-	-	-	x
Neocosmospora falciformis	DTO 424-I9	CBS 146663	Yelwa Doma	Nasarawa	Soil	-	-	-	LR792606	-	-	-	x
Neocosmospora falciformis		CBS 146667	Mada Station	Nasarawa	Soil	-	-	-	LR792607	-	-	-
Neocosmospora falciformis		CBS 146652	Tundun Adabu	Nasarawa	Soil	-	-	-	LR792608	-	-	-
Neocosmospora falciformis		CBS 146643	Yelwa Doma	Nasarawa	Soil from groundnut and maize farm	-	-	-	LR792609	-	-	-
Neocosmospora ipomoeae	DTO 424-H7	CBS 146646	Nubwa Koro	Niger	Soil from maize and yam farm	-	-	-	LR792610	-	-	-	x
Neocosmospora suttoniana	DTO 424-I8	CBS 146668	Mada Station	Nasarawa	Soil	-	-	-	LR792611	-	-	-	x
Neocosmospora vasinfecta		CBS 146664	Sabon Wuse	Niger	Soil from ginger farm	-	-	-	LR792612	-	-	-
Neotestudina rosatii	DTO 423-B8		Yelwa Doma	Nasarawa	Soil from maize and sorghum farm	-	-	-	-	-	-	MT251158
Neotestudina rosatii	DTO 423-B9		Yelwa Doma	Nasarawa	Soil from maize and sorghum farm	-	-	-	-	-	-	MT251159
Neotestudina rosatii	DTO 423-C1		Yelwa Doma	Nasarawa	Soil from maize and sorghum farm	-	-	-	-	-	-	MT251160
Neotestudina rosatii	DTO 423-C2		Mada station	Nasarawa	Soil from maize farm	-	-	-	-	-	-	MT251161
Neotestudina rosatii	DTO 423-C3		Nubwa Koro	Niger	Soil from yam farm	-	-	-	-	-	-	MT251162	x
Neotestudina rosatii	DTO 423-C4		Mada station	Nasarawa	Soil from groundnut farm	-	-	-	-	-	-	MT251163	x
Neotestudina rosatii	DTO 423-C5		Mada station	Nasarawa	Soil from maize farm	-	-	-	-	-	-	MT251164
Neotestudina rosatii	DTO 423-C6		Yelwa Doma	Nasarawa	Soil from groundnut and maize farm	-	-	-	-	-	-	MT251165
Neotestudina rosatii	DTO 423-C7		Mada station	Nasarawa	Soil from yam farm	-	-	-	-	-	-	MT251166
Neotestudina rosatii	DTO 423-C8		Sabon Wuse	Niger	Soil from groundnut farm	-	-	-	-	-	-	MT251167
Neotestudina rosatii	DTO 423-C9		Yelwa Doma	Nasarawa	Soil from maize and sorghum farm	-	-	-	-	-	-	MT251168
Neotestudina rosatii	DTO 423-D1		Mada station	Nasarawa	Soil from yam farm	-	-	-	-	-	-	MT251169
Neotestudina rosatii	DTO 423-D2		Sabon Wuse	Niger	Soil from groundnut farm	-	-	-	-	-	-	MT251170
Neotestudina rosatii	DTO 423-D3		Yelwa Doma	Nasarawa	Soil from groundnut and maize farm	-	-	-	-	-	-	MT251171
Phoma sp.	DTO 421-F5		Mada station	Nasarawa	Sorghum	-		-	-	-	MT251172	-	x
Phoma sp.	DTO 421-F6		Mada station	Nasarawa	Sorghum	-		-	-	-	MT251173	-	x
BenA = β-tubulin. CaM = Calmodulin. CBS = Culture collection of the Westerdijk Fungal Biodiversity Institute (WI), Utrecht, The Netherlands. DTO = Working collection, Food and Indoor Mycology, held at WI. ENA = European Nucleotide Archive. ITS = Internal transcribed spacer region of the rDNA. LSU = Large subunit of the rDNA. RPB1 = RNA polymerase II largest subunit. RPB2 = RNA polymerase II secon…

## Sheet: Supplementary Table 2
Strain data and accession numbers of additional strains included in phylogenetic analyses of Fusarium and related taxa
Species name	Strain	Country	Host	GenBank/ENA accession number
				BenA	CaM	RPB1	RPB2	TEF-1a
Fusarium agapanthi	NRRL 54463	Australia	Agapanthus sp.	KU900635	KU900611	KU900620	KU900625	KU900630
Fusarium ananatum	CBS 118516	South Africa	Ananas comosus fruit	LT996112	LT996175	LT996188	LT996137	LT996091
Fusarium andiyazi	CBS 119857 = NRRL 31727	South Africa	Sorghum bicolor soil debris	LT996113	LT996176	LT996189	KT154004	LT996092
Fusarium andiyazi	CBS 119856	Ethiopia	Sorghum sp. grain	LR792544	LR792536	LR792576	LR792613	LR792626
Fusarium andiyazi	CBS 134430	Turkey	Human blood	LR792545	LR792537	LR792577	LR792614	LR792627
Fusarium anthophilum	CBS 737.97 = NRRL 13602	Germany	Hippeastrum sp.	LT996114	LT996177	LT996190	LT996139	LT996093
Fusarium babinda	CBS 396.96 = NRRL 25539	Australia	Soil	-	-	-	JX171632	-
Fusarium bactridioides	NRRL 20476	USA	Cronartium conigenum	U34434	AF158343	-	-	AF160290
Fusarium begoniae	CBS 403.97 = NRRL 25300	Germany	Begonia elatior hybrid	U61543	AF158346	LT996191	LT996140	AF160293
Fusarium beomiforme	CBS 740.97 = NRRL 25174	New Caledonia	Soil	-	-	-	JX171619	-
Fusarium buharicum	CBS 796.70 = NRRL 13371	Iran	Hibiscus cannabinus stalk	-	-	-	JX171563	-
Fusarium bulbicola	CBS 220.76 = NRRL 13618	Germany	Nerine bowdenii	KF466437	KF466327	KF466394	KF466404	KF466415
Fusarium burgessii	CBS 125537	Australia	Soil	-	-	-	HQ646393	-
Fusarium circinatum	CBS 405.97 = NRRL 25331	USA	Pinus radiata	KM232080	KM231393	JX171510	HM068354	KM231943
Fusarium citricola	CPC 27067	Italy	Citrus limon	-	-	-	LT746307	-
Fusarium concentricum	CBS 450.97 = NRRL 25181	Costa Rica	Musa sapientum fruit	U61548	AF158335	LT996192	JF741086	AF160282
Fusarium concolor	CBS 961.87 = NRRL 13459	South Africa	Plant debris	-	-	-	JX171569	-
Fusarium continuum	F201030	China	Zanthoxylum bungeanum stem tissue	-	-	-	KM236782	-
Fusarium denticulatum	CBS 735.97 = NRRL 25302	USA	Ipomoea batatas	U61550	AF158322	LT996195	LT996143	AF160269
Fusarium equiseti	CBS 245.61 = NRRL 20697	Chile	Beta vulgaris	-	-	-	GQ505772	-
Fusarium flocciferum	CBS 831.85 = NRRL 25473	Germany	Triticum aestivum	-	-	-	JX171627	-
Fusarium foetens	NRRL 38302	Chile	Pinus radiata seedling stem	-	-	-	JX171652	-
Fusarium fractiflexum	NRRL 28852	Japan	Cymbidium sp.	AF160315	AF158341	LR792578	LT575064	AF160288
Fusarium fujikuroi	NRRL 13566	China	Oryza sativa	U34415	AF158332	JX171456	JX171570	AF160279
Fusarium gaditjirri	NRRL 45417	Australia	Heteropogon triticeus	-	-	-	JX171654	-
Fusarium globosum	CBS 428.97 = NRRL 26131	South Africa	Zea mays	KF466439	KF466329	KF466396	KF466406	KF466417
Fusarium graminearum	CBS 123657 = NRRL 31084	USA	Corn	-	-	-	JX171644	-
Fusarium graminum	CBS 737.79 = NRRL 20692	Ethiopia	Cynodon dactylon	-	-	-	JX171593	-
Fusarium heterosporum	CBS 720.79 = NRRL 20693	Netherlands	Claviceps purpurea on Lolium perenne	-	-	-	JX171594	-
Fusarium hostae	NRRL 29889	USA	Hosta sp.	-	-	-	JX171640	-
Fusarium konzum	CBS 119849	USA	Sorghastrum nuttans	LT996118	LT996182	LT996200	LT996148	LT996098
Fusarium lactis	CBS 411.97 = NRRL 25200	USA	Ficus carica	U61551	AF158325	LT996201	LT996149	AF160272
Fusarium lateritium	CBS 130184 = NRRL 25197	Venezuela	Bambusa vulgaris	-	-	-	HM347207	-
Fusarium lyarnte	CBS 125536 = NRRL 54252	Australia	Sorghum interjectum	-	-	-	JX171661	-
Fusarium mangiferae	NRRL 25226	Israel	Mangifera indica	U61561	AF158334	JX171509	HM068353	AF160281
Fusarium mexicanum	NRRL 47473	Mexico	Mangifera indica inflorescence	GU737308	GU737389	LR792579	LR792615	GU737416
Fusarium napiforme	CBS 748.97 = NRRL 13604	Namibia	Pennisetum typhoides	U34428	AF158319	HM347136	EF470117	AF160266
Fusarium nelsonii	NRRL 13338	Australia	Soil	-	-	-	GQ505466	-
Fusarium nisikadoi	CBS 742.97 = NRRL 25179	Japan	Phyllostachys nigra var. henonis	-	-	-	JX171620	-
Fusarium nurragi	CBS 392.96 = NRRL 36452	Australia	Soil	-	-	-	JX171650	-
Fusarium nygamai	CBS 749.97 = NRRL 13448	Australia	Sorghum sp. root	-	-	-	EF470114	-
Fusarium oxysporum	CBS 716.74 = NRRL 20433	Germany	Vicia faba vascular bundle	U34435	AF158366	JX171469	JX171583	AF008479
Fusarium oxysporum	CBS 744.97 = NRRL 22902	USA	Pseudotsuga menziesii	U34424	AF158365	LT996203	LT575065	AF160312
Fusarium cugenangense	CBS 130308 = NRRL 25387	New Zealand	Human toenail	-	-	-	JX171625	-
Fusarium phyllophilum	CBS 216.76 = NRRL 13617	Italy	Dracaena deremensis leaf	KF466443	KF466333	KF466399	KF466410	KF466421
Fusarium poae	NRRL 13714	Canada	Overwintered wheat	-	-	-	JX171572	-
Fusarium proliferatum	CBS 217.76 = NRRL 22944	Germany	Cattleya pseudobulb hybrid	U34416	AF158333	JX171504	HM068352	AF160280
Fusarium pseudocircinatum	CBS 126.73 = NRRL 22946	Ghana	Solanum sp.	U34427	AF158324	LT996204	LT996151	AF160271
Fusarium pseudograminearum	CBS 109956 = NRRL 28062	Australia	Hordeum vulgare crown	-	-	-	JX171637	-
Fusarium pseudonygami	CBS 417.97 = NRRL 13592	Nigeria	Pennisetum typhoides	U34421	AF158316	LT996205	LT996152	AF160263
Fusarium ramigenum	CBS 418.97 = NRRL 25208	USA	Ficus carica	KF466445	KF466335	KF466401	KF466412	KF466423
Fusarium redolens	CBS 743.97 = NRRL 22901	Canada	Plant seedling	-	-	-	JX171616	-
Fusarium sacchari	CBS 223.76 = NRRL 13999	India	Saccharum officinarum	U34414	AF158331	JX171466	JX171580	AF160278
Fusarium salinense	CPC 26457	Italy	Citrus sinensis	-	-	-	LT746305	-
Fusarium sambucinum	NRRL 22187	England	Solanum sp.	-	-	-	JX171606	-
Fusarium scirpi	NRRL 13402	Australia	Soil from pine nursery	-	-	-	GQ505770	-
Fusarium torreyae	NRRL 54149	USA	Torreya sp.	-	-	-	HM068359	-
Fusarium sp.	NRRL 26756	South Africa	Ornamental grass	AF160322	AF158360	LR792580	LR792616	AF160307
Fusarium sterilihyposum	NRRL 25623	South Africa	Mangifera indica	AF160316	AF158353	LR792581	LR792617	AF160300
Fusarium stilboides	NRRL 20429	Nyasaland	Coffea sp. bark	-	-	-	JX171582	-
Fusarium subglutinans	CBS 747.97 = NRRL 22016	USA	Zea mays	U34417	AF158342	JX171486	JX171599	AF160289
Fusarium sublunatum	CBS 189.34 = NRRL 13384	Costa Rica	Soil on banana plantation	-	-	-	JX171565	-
Fusarium succisae	CBS 219.76 = NRRL 13613	Germany	Succisa pratensis flower	U34419	AF158344	LT996207	LT996154	AF160291
Fusarium temperatum	NRRL 25622	South Africa	Zea mays	AF160317	AF158354	LR792582	LR792618	AF160301
Fusarium thapsinum	CBS 733.97 = NRRL 22045	South Africa	Sorghum bicolor	U34418	LT996186	JX171487	JX171600	AF160270
Fusarium torulosum	NRRL 22748	Netherlands	Buxus sp.	-	-	-	JX171615	-
Fusarium tricinctum	CBS 393.93 = NRRL 25481	Germany	Culm base of winter wheat	-	-	-	JX171629	-
Fusarium tupiense	NRRL 53984	Brazil	Mangifera indica	GU737296	GU737377	LR792583	LR792619	GU737404
Fusarium udum	CBS 178.32 = NRRL 22949	Germany	Lactarius pubescens	U34433	AF158328	LT996220	LT996172	AF160275
Fusarium verrucosum	NRRL 22566	Venezuela	Bamboo culm	-	-	-	JX171613	-
Fusarium verticillioides	CBS 734.97 = NRRL 22172	Germany	Zea mays	U34413	AF158315	LT996221	EF470122	AF160262
Fusarium zanthoxyli	NRRL 66217	China	Zanthoxylum bungeanum	-	-	-	KM236757	-
Fusicolla aquaeductuum	CBS 734.79 = NRRL 20686	Germany	Drinking water	-	-	-	JX171590	-
Fusicolla sp.	NRRL 22136	India	Waste water	-	-	-	JX171604	-
Neocosmospora euwallaceae	CBS 135854 = NRRL 54722	Israel	Beetle from avocado tree	-	-	-	JQ038028	-
Neocosmospora falciformis	CBS 475.67	Puerto Rico	Human mycetoma	-	-	-	LT960558	-
Neocosmospora ipomoeae	CBS 225.58 = NRRL 22235	Panama	Unsterilized dewaxed cotton	-	-	-	LR583830	-
Neocosmospora pisi	CBS 123669 = NRRL 45880	USA	Progeny of sexual cross, parentals from Pisum sativum and soil	-	-	-	EU329640	-
Neocosmospora solani	CBS 140079	Slovenia	Solanum tuberosum	-	-	-	KT313623	-
Neocosmospora suttoniana	CBS 143214 = NRRL 32858	USA	Human wound	-	-	-	EU329630	-
Neocosmospora vasinfecta	CBS 237.55	South Africa	Medicago sativa	-	-	-	LR583892	-
BenA = β-tubulin. CaM = Calmodulin. CBS = Culture collection of the Westerdijk Fungal Biodiversity Institute (WI), Utrecht, The Netherlands. CPC = working collection of Pedro W. Crous, held at WI. DTO = Working collection, Food and Indoor Mycology, held at WI. ENA = European Nucleotide Archive. F = College of Forestry, Northwest A&F University, Yangling, China. NRRL = Agricultural Research Servic…
